# 1 Heterologous expression of cryptomaldamide in a cyanobacterial host

2

3 Arnaud Taton<sup>1</sup>, Andrew Ecker<sup>2</sup>, Brienna Diaz<sup>1</sup>, Nathan A. Moss<sup>2</sup>, Brooke Anderson<sup>1</sup>, Raphael  
4 Reher<sup>2</sup>, Tiago F. Leão<sup>2,3</sup>, Ryan Simkovsky<sup>1</sup>, Pieter C. Dorrestein<sup>3</sup>, Lena Gerwick<sup>2</sup>, William H.  
5 Gerwick<sup>2,3</sup>, James W. Golden<sup>1</sup>

6

7 <sup>1</sup>Division of Biological Sciences, <sup>2</sup>Center for Marine Biotechnology and Biomedicine, Scripps  
8 Institution of Oceanography, <sup>3</sup>Skaggs School of Pharmacy and Pharmaceutical Sciences,  
9 University of California, San Diego, La Jolla, California 92093, United States

10

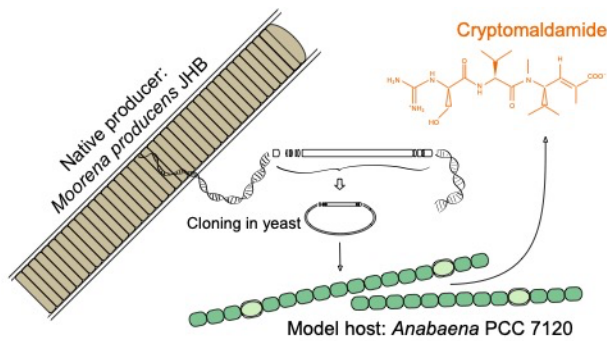

11

1 **ABSTRACT**

2 Filamentous marine cyanobacteria make a variety of bioactive molecules that are produced  
3 by polyketide synthases, non-ribosomal peptide synthetases, and hybrid pathways that are  
4 encoded by large biosynthetic gene clusters. These cyanobacterial natural products represent  
5 potential drugs leads; however, thorough pharmacological investigations have been impeded by  
6 the limited quantity of compound that is typically available from the native organisms.  
7 Additionally, investigations of the biosynthetic gene clusters and enzymatic pathways have been  
8 difficult due to the inability to conduct genetic manipulations in the native producers. Here we  
9 report a set of genetic tools for the heterologous expression of biosynthetic gene clusters in the  
10 cyanobacteria *Synechococcus elongatus* PCC 7942 and *Anabaena* (*Nostoc*) PCC 7120. To  
11 facilitate the transfer of gene clusters in both strains, we engineered a strain of *Anabaena* that  
12 contains *S. elongatus* homologous sequences for chromosomal recombination at a neutral site  
13 and devised a CRISPR-based strategy to efficiently obtain segregated double recombinant  
14 clones of *Anabaena*. These genetic tools were used to express the large 28.7 kb  
15 cryptomaldamide biosynthetic gene cluster from the marine cyanobacterium *Moorena* (*Moorea*)  
16 *producing* JHB in both model strains. *S. elongatus* did not produce cryptomaldamide, however  
17 high-titer production of cryptomaldamide was obtained in *Anabaena*. The methods developed in  
18 this study will facilitate the heterologous expression of biosynthetic gene clusters isolated from  
19 marine cyanobacteria and complex metagenomic samples.

20

21 **KEYWORDS:** Cyanobacteria, natural products, heterologous expression, cryptomaldamide

22

23

## 1 INTRODUCTION

2 Cyanobacteria are sources of diverse bioactive secondary metabolites including toxins and  
3 other natural products (NPs).<sup>1, 2</sup> Some species are notorious contributors to harmful algal  
4 blooms, particularly in freshwater lakes, ponds, and reservoirs, where they release various toxic  
5 molecules and sometimes cause animal and human health issues.<sup>3</sup> Many cyanobacteria,  
6 whether from freshwater, terrestrial, or marine environments, carry large biosynthetic gene  
7 clusters (BGCs) that encode for the biosynthesis of diverse bioactive molecules.<sup>4-6</sup> The definitive  
8 roles of these compounds in nature are still elusive, but they may serve as signaling molecules,  
9 toxins, or allelochemicals that may inhibit competitors or act as a deterrent to predators.<sup>7, 8</sup> Their  
10 wide spectrum of structures and biological activities makes cyanobacterial compounds attractive  
11 as sources of drugs and drug leads.<sup>1, 9</sup>

12 Interestingly, the molecular structures of NPs from marine cyanobacteria are distinct from  
13 those of their terrestrial and freshwater relatives;<sup>4, 10</sup> they are composed of nitrogen-rich  
14 scaffolds with significant structural diversity and modifications resulting from halogenation,  
15 methylation, and oxidation.<sup>2</sup> Marine cyanobacterial NPs are frequently produced by non-  
16 ribosomal peptide synthetase (NRPS), polyketide synthase (PKS), or NRPS-PKS hybrid  
17 pathways with a variety of tailoring steps.<sup>11</sup> Marine cyanobacterial NPs include bioactive  
18 chemicals with diverse structures and bioactivities that could be useful in the treatment of  
19 cancer, neurological disorders, and infectious diseases;<sup>12</sup> and that have anti-inflammatory  
20 properties<sup>13</sup> or confer UV protection.<sup>14, 15</sup>

21 The isolation of NPs from environmental samples or cyanobacterial laboratory cultures  
22 typically yields low quantities of the compound, making full characterization of the molecules  
23 challenging. The assessment of the full potential of these molecules as drug leads often  
24 requires producing the compounds by organic synthesis.<sup>16</sup> Transcriptomics and metabolomics  
25 along with genome sequence bioinformatics have also revealed that a large fraction of these  
26 BGCs are not expressed in standard laboratory cultures, leaving a substantial fraction of diverse  
27 cyanobacterial natural product compounds unexplored.<sup>17</sup> Recent studies have shown that  
28 altered growth conditions can result in upregulation of some cryptic BGCs;<sup>17, 18</sup> however, this  
29 approach still leaves many BGCs unexpressed in laboratory growth conditions.

30 Many advances have been made for the screening, detection, and identification of  
31 cyanobacterial NPs<sup>16, 19, 20</sup> and their BGCs.<sup>4, 5, 21</sup> However, none of these filamentous marine  
32 cyanobacteria have been genetically tractable to date. The lack of genetic methods and tools for  
33 these strains, coupled with the limited development of appropriate heterologous expression  
34 hosts, has hampered production of the larger amounts of these specialized compounds that are

1 necessary for pharmacological studies. Investigations of the genetic underpinnings of  
2 cyanobacterial biosynthetic pathways have lagged behind those of some prominent classes of  
3 heterotrophic bacteria, such as actinobacteria and myxobacteria.<sup>22</sup>

4 Ribosomally synthesized and post-translationally modified peptides (RiPPs) including  
5 patellamide, microviridins, and mycosporine-like amino acids (MAAs) from cyanobacteria have  
6 been produced in *E. coli*.<sup>23-26</sup> However, heterologous expression of NRPS, PKS, and NRPS-  
7 PKS hybrid biosynthetic pathways has proven to be more difficult.<sup>27</sup> Successful production was  
8 obtained in *E. coli* upon replacement of the native promoters for lyngbyatoxin A, which is  
9 encoded by a relatively small 11.3-kb NRPS-terpene hybrid gene cluster, originally obtained  
10 from an environmental collection of *Moorena (Moorea) producens*.<sup>28</sup> Two microcystin  
11 congeners, encoded by a 55-kb hybrid PKS/NRPS gene cluster from *Microcystis aeruginosa*  
12 PCC 7806, were also produced in *E. coli*.<sup>29</sup> The production of lyngbyatoxin A was also  
13 attempted in *Streptomyces coelicolor* A3(2) but did not succeed,<sup>30</sup> whereas the polyketide-  
14 peptide hybrid barbamide derivative 4-O-demethylbarbamide was produced in *Streptomyces*  
15 *venezuelae* but with a very low yield (<1 µg/L).<sup>31</sup> Finally, the lyngbyatoxin A BGC was  
16 expressed in the cyanobacterium *Anabaena (Nostoc)* sp. strain PCC 7120 (hereafter  
17 *Anabaena*) and led to the production of lyngbyatoxin A with yields comparable to those of the  
18 native *M. producens*.<sup>32</sup> Recently, the lyngbyatoxin pathway was further engineered in *Anabaena*  
19 to produce pendolmycin and teleocidin B-4.<sup>33</sup>

20 The development of approaches for the heterologous expression of NP pathways is  
21 important to facilitate the characterization and screening of cyanobacterial NPs for  
22 pharmaceutical applications. Strains of the genus *Moorena*, previously named *Moorea*<sup>34</sup>, have  
23 been found to harbor over 40 different biosynthetic gene clusters and close to 200 novel NPs  
24 have been chemically identified from *Moorena* spp.<sup>4</sup> *Moorena* strains have been obtained from  
25 the photic zone of tropical marine reefs, rocks, and mangroves around the globe. There are no  
26 genetic methods for any *Moorena* strain and they grow slowly with cell division occurring only  
27 once every 6 days.<sup>35, 36</sup>

28

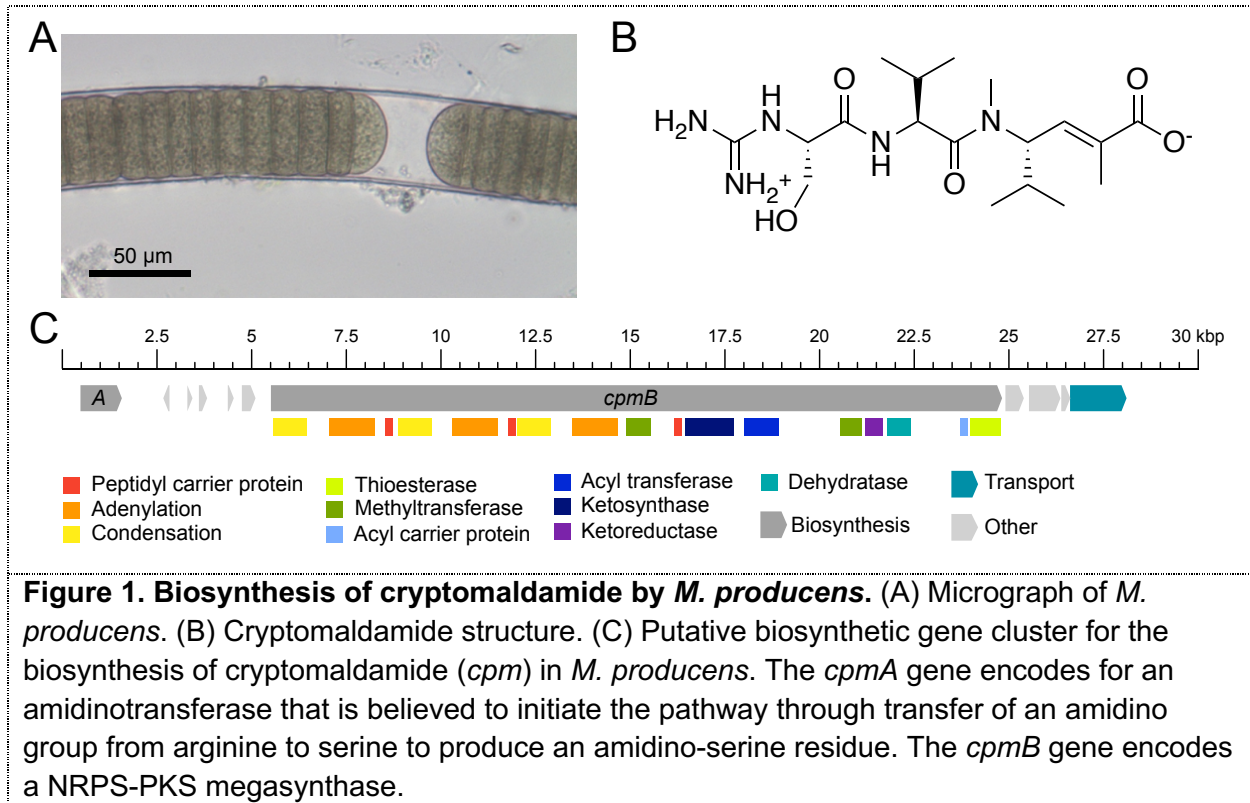

1  
2 The *Moorena producens* strain JHB (hereafter *M. producens*), isolated from Hector's Bay,  
3 Jamaica, carries 44 BGCs in its genome, including those encoding for production of  
4 hectochlorin, hectoramide, jamaicamide, and the recently discovered compound  
5 cryptomaldamide.<sup>4, 16, 37</sup> Interestingly, cryptomaldamide is somewhat structurally similar to  
6 guadinomine B, an anti-infective compound produced by *Streptomyces* sp. K01-0509.  
7 Guadinomine B has an unusual mode of action and is a very potent inhibitor of the type III  
8 secretion system (TTSS).<sup>38</sup>  
9 The putative cryptomaldamide biosynthetic pathway in *M. producens* is encoded by a 28.7-  
10 kb gene cluster (Figure 1).<sup>16</sup> To facilitate studies of cryptomaldamide biosynthesis and  
11 pharmacology, we transferred the *M. producens* cryptomaldamide BGC pathway into two  
12 genetically tractable model strains of cyanobacteria, and successfully obtained  
13 cryptomaldamide production in *Anabaena*.

14

## 15 RESULTS AND DISCUSSION

### 16 Construction of a TAR cloning plasmid and capture of the cryptomaldamide BGC

17 We first attempted to express the cryptomaldamide BGC in *Synechococcus elongatus*  
18 strain PCC 7942 (hereafter *S. elongatus*) because of its many advantages as a well-studied

1 cyanobacterial model strain. *S. elongatus* is used for the study of basic biology such as its  
2 bacterial circadian clock and as a platform for synthetic biology and genetic engineering.<sup>39, 40</sup> *S.*  
3 *elongatus* primary metabolism has been extensively studied and modeled.<sup>41, 42</sup> *S. elongatus*  
4 grows rapidly and has a streamlined genome and facile genetics. It is naturally competent for  
5 DNA uptake, and large DNA fragments can be efficiently transferred by conjugation from *E.*  
6 *coli*.<sup>43, 44</sup> Gene knockouts can be easily made and segregation can be achieved efficiently. Gene  
7 knockins and replacements can be done at native or neutral sites on the chromosome. Three  
8 neutral sites, which are sites or genes where ectopic or heterologous sequences can be  
9 inserted with no effect on known phenotypes, are commonly used for in *S. elongatus*. A large  
10 number of genetic tools are available for *S. elongatus*.<sup>45-48</sup> The strain has been used as a  
11 platform for the heterologous production of various compounds including short chain alcohols,  
12 olefins, fatty acids, hydrocarbons, organic acids sugars, diols, and polyols.<sup>49</sup> Recently, we  
13 reported the heterologous production of methyl branched wax esters in *S. elongatus*; this  
14 involved engineering the production of a methylmalonate precursor, the expression of the  
15 *Bacillus subtilis* promiscuous Sfp phosphopantetheinyl transferase (Sfp-PPTase), and  
16 developing a T7-polymerase expression system.<sup>50</sup>

17 To assemble the cryptomaldamide BGC from the non-genetically tractable cyanobacterium  
18 *M. producens*, we used transformation-associated recombination (TAR) in yeast (Figure 2).<sup>51</sup>  
19 The cryptomaldamide BGC was amplified by PCR from genomic DNA as 3 overlapping  
20 fragments and cloned into pAM5571 (Figure 3) in *Saccharomyces cerevisiae* VL6-48N by TAR.  
21 The resulting plasmids isolated from yeast cells were screened by PCR, and positive plasmid  
22 clones were then transferred into *E. coli* and verified by restriction digests.

23

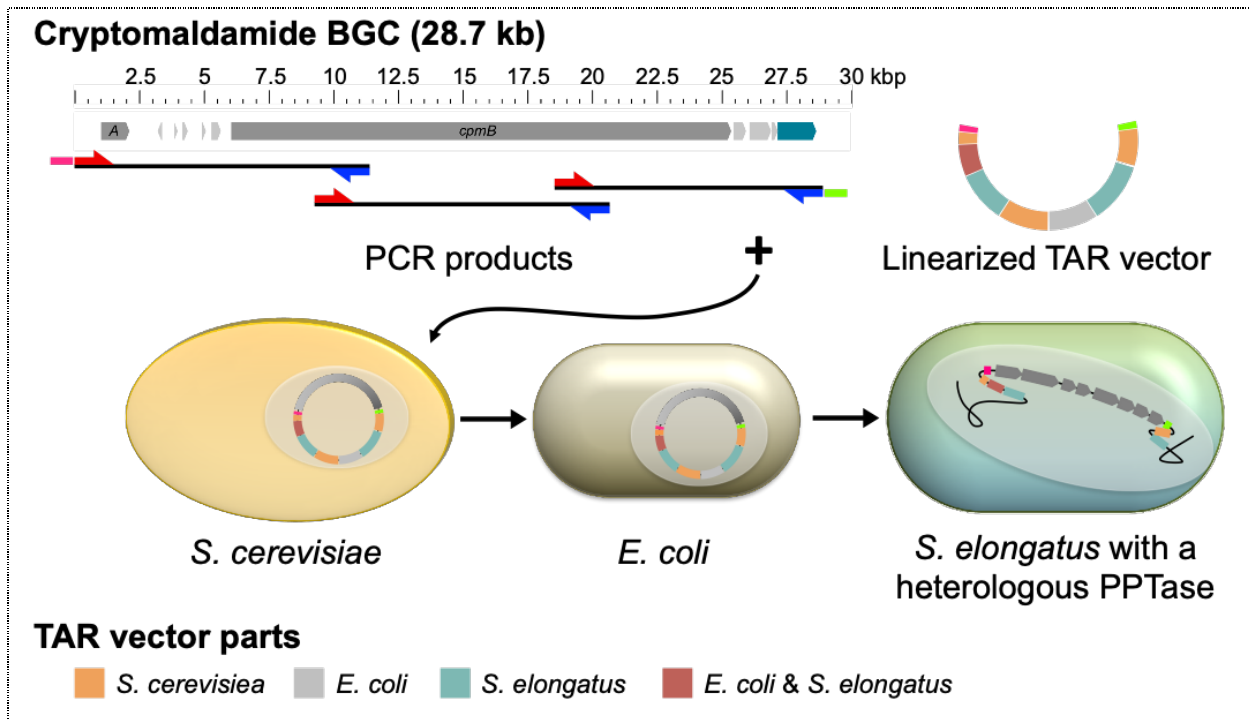

**Figure 2. Strategy for cloning the cryptomaldamide BGC into *S. elongatus*.** The cryptomaldamide BGC was amplified by PCR from genomic DNA as 3 overlapping fragments covering 28,095 bp starting 408 nucleotides upstream of the *cpmA* start codon to 47 nucleotides downstream of a multi-antimicrobial extrusion protein (MATE) efflux family protein gene. The first and last PCR products carried 40 nucleotides, pink and green dashes, that overlap with the ends, pink and green segments, of the linearized *S. elongatus* TAR cloning vector pAM5571. The 3 PCR products and pAM5571 were assembled in *S. cerevisiae* by recombination. Yeast clones containing plasmids carrying the entire BGC were identified by PCR. Positive plasmids were then transformed into *E. coli* and further verified by restriction digests with *Nco*I. Finally, positive plasmid clones prepared from *E. coli* were transformed into *S. elongatus*. Red arrows, forward primers; blue arrows, reverse primers.

1

## 2 Heterologous expression of the cryptomaldamide BGC in *S. elongatus*

3 Initially, plasmid DNA from 4 independent positive *E. coli* clones containing the  
4 cryptomaldamide BGC were transferred by natural transformation into *S. elongatus* AMC2566.  
5 This strain has been engineered to express the promiscuous *B. subtilis* Sfp PPTase.<sup>50</sup>  
6 Transcription of the BGC was evaluated and cultures were screened for the production of  
7 cryptomaldamide by LC-MS/MS. Although RT-qPCR demonstrated transcription of the BGC  
8 (Figure S1), none of the 4 strains produced cryptomaldamide at detectable levels.

9 Because the BGC was reconstructed using large DNA fragments produced by PCR, we  
10 were concerned that deleterious mutations may have been introduced into the BGC leading to  
11 non-functional enzymes. To overcome this potential problem, we made 64 new clones of *S.*



1 *elongatus*, each carrying the BGC after transformation with a pool of 84 independent plasmid  
2 clones that had been verified by restriction digests (Figure S2). These *S. elongatus*  
3 transformants were then analyzed by MALDI analysis as previously reported for  
4 cryptomaldamide,<sup>16</sup> but none produced cryptomaldamide at detectable levels. To more  
5 definitively eliminate the possibility that deleterious mutations were the cause of the failure to  
6 produce cryptomaldamide, 6 plasmid clones were sequenced. The sequencing reads were  
7 mapped onto the predicted sequence of the desired plasmid and the genetic variations were  
8 identified using the breseq program.<sup>52</sup> We found that all 6 clones contained the same single  
9 nucleotide change in the *cpmA-cpmB* intergenic region (Table S1), which suggests that it may  
10 have preexisted in the gDNA for the native pathway or possibly was introduced during the early  
11 cycles of the PCR. One clone, CR92, did not carry any other mutations (Table S1). The CR92  
12 plasmid clone, which we show below was capable of encoding for the production of  
13 cryptomaldamide in *Anabaena*, was transformed into *S. elongatus* and the resulting strain was  
14 evaluated by MALDI analysis and LC-MS/MS; however, neither cryptomaldamide nor any  
15 related compounds were produced at detectable levels.

16 Previous reports indicated that the cyanobacterial strain *Anabaena* PCC 7120 has an Sfp-  
17 PPTase, HetI, that is similar to the promiscuous *Bacillus subtilis* Sfp-PPTase and has high  
18 activity for carrier protein substrates of several NRPS and NRPS/PKS hybrid pathways from  
19 cyanobacteria.<sup>32, 53</sup> To address the possibility that PPTase activity was the limiting factor for  
20 production of cryptomaldamide in *S. elongatus*, we expressed the *Anabaena hetI* gene from the  
21 constitutive conII promoter in the strain of *S. elongatus* carrying the cryptomaldamide pathway.  
22 However, heterologous *hetI* expression did not result in production of cryptomaldamide in *S.*  
23 *elongatus*, which could be caused by several problems such as inefficient translation, protein  
24 folding, or protein stability.

### 25 **Heterologous expression of the cryptomaldamide BGC in *Anabaena***

26 Although we did not obtain cryptomaldamide production in *S. elongatus*, we reasoned that  
27 the synthesis of functional proteins for this pathway might succeed in a different host that  
28 contained native PKS and NRPS/PKS pathways. *Anabaena* is a well-established model strain  
29 for nitrogen-fixing filamentous cyanobacteria, and it has good growth properties and well-  
30 developed genetic tools. Importantly, lyngbyatoxin A, another natural product of Hawaiian  
31 strains of *M. producens*, was successfully produced in *Anabaena* and several promoters  
32 isolated from other *M. producens* BGCs (e.g. barbamide A, curacin A, and jamaicamide) were  
33 shown to be active in *Anabaena*.<sup>32</sup> In addition, the *Anabaena* genome has a low (41%) GC  
34 content that is similar to *M. producens* (44%), whereas the *S. elongatus* genome has a high GC



1 content (55%). Finally, we reasoned that it is possible that *Anabaena* could provide a better  
2 protein-folding environment for large NP biosynthetic pathway enzymes because it has a larger  
3 genome containing several PKS and NRPS/PKS hybrid BGCs.<sup>6</sup>

4

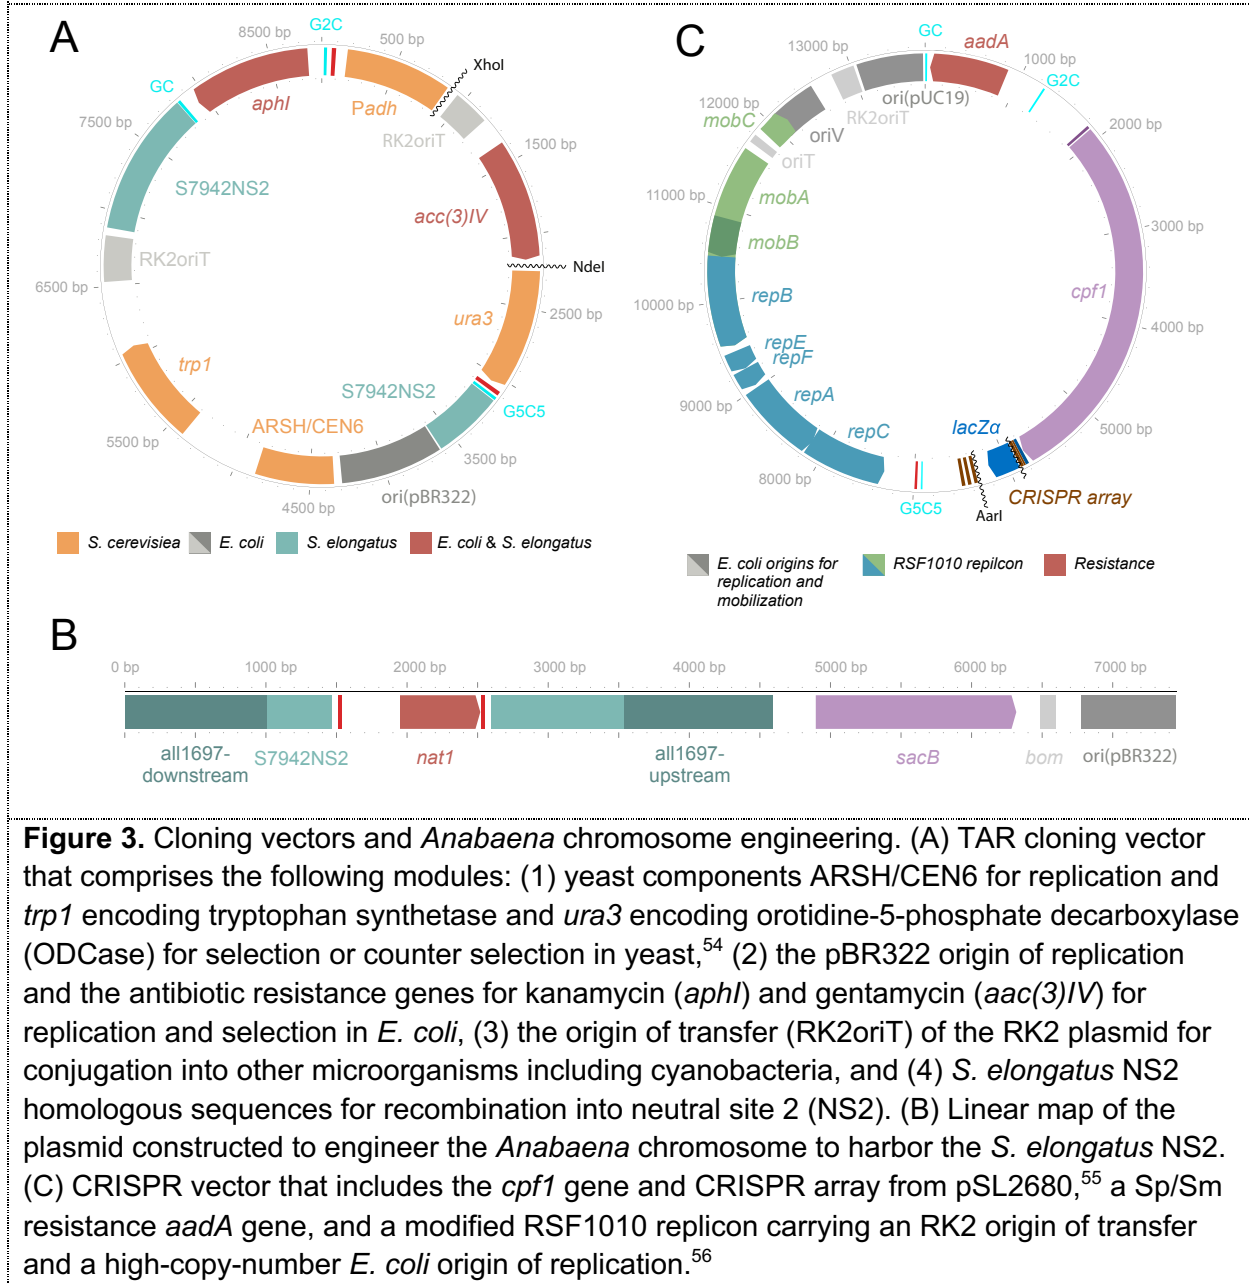

5

6 Because the cryptomaldamide BGC was already cloned in a vector for integration into the  
7 *S. elongatus* chromosome at neutral-site 2, we realized that it would be useful for current and  
8 future experiments to place the *S. elongatus* NS2 region of homology into the *Anabaena*  
9 chromosome. Therefore, we engineered *S. elongatus* neutral-site 2 (S7942NS2) homology

1 regions flanking an antibiotic resistance gene for nourseothricin (Nt) into the *Anabaena*  
2 chromosome at a previously identified neutral site in the all1697 gene<sup>57</sup> to create *Anabaena*  
3 strain AMC2556, which carries neutral-site 2 (named A7120NS2) (Figure 3).

4 The plasmid from clone CR92 carrying the cryptomaldamide BGC was transferred into the  
5 AMC2556 by biparental conjugation. When a plasmid carrying homologous DNA sequences is  
6 transferred to *Anabaena*, single cross-over events that integrate the entire plasmid occur more  
7 often than double cross-over events that lose the vector sequences.<sup>58</sup> In addition, like other  
8 cyanobacteria, *Anabaena* cells contain 4 to 8 copies of the chromosome and the isolation of  
9 stable mutants requires the segregation of engineered chromosomes. The selection of  
10 segregated double recombinant clones in *Anabaena* can be facilitated by a *sacB* gene carried  
11 on the plasmid backbone and selection on media containing sucrose.<sup>58</sup> Here, because CR92 did  
12 not carry the *sacB* gene, we devised an alternative strategy that relied on a CRISPR/Cpf1  
13 system shown to work well in several strains of cyanobacteria including *Anabaena*.<sup>55, 59</sup> Because  
14 previously developed plasmids were not directly useable due to antibiotic incompatibilities, we  
15 constructed a CRISPR/Cpf1 module compatible with the CYANO-VECTOR platform<sup>48</sup>, which  
16 enabled the construction of CRISPR/Cpf1 plasmids with different antibiotic resistance genes  
17 and replicons. The CRISPR/Cpf1 module was then assembled with a  
18 spectinomycin/streptomycin resistance gene, and a modified RSF1010 replicon carrying the  
19 high copy pUC19 origin of replication,<sup>56</sup> to produce pAM5572 (Figure 3). Subsequently, a guide  
20 RNA template designed to target the nourseothricin resistance (Nt<sup>R</sup>) gene in the A7120NS2  
21 neutral site in strain AMC2556 was cloned into pAM5572 by golden gate cloning<sup>60</sup> using 2  
22 complementary annealed oligonucleotides to produce pAM5565. To obtain segregated double  
23 recombinant strains of *Anabaena* carrying the cryptomaldamide BGC, pAM5565 was transferred  
24 into an unsegregated strain of *Anabaena* carrying the cryptomaldamide BGC that was shown to  
25 produce cryptomaldamide in preliminary analyses. Isolated colonies were then counter-  
26 screened on nourseothricin-containing plates and sensitive clones were PCR-verified for  
27 complete segregation (Figure S3).

## 28 **Production cryptomaldamide in *Anabaena***

### 29 *Detection of cryptomaldamide in the cell biomass and the growth medium*

30 Before we obtained segregated clones, three independent colonies (AMC2560, AMC2561,  
31 AMC2562) of *Anabaena* carrying the cryptomaldamide BGC were selected, analyzed by PCR  
32 for the presence of the BGC, and then grown in cultures to determine if they produced  
33 cryptomaldamide. These clones and AMC2556 as a negative control were grown for 10 days in  
34 150 mL BG-11 medium bubbled with air to an OD<sub>750</sub> of approximately 0.8. Extracts of the cell

1 biomass and the growth medium were analyzed by LC-MS/MS and both showed a peak  
2 matching the retention time and molecular ion  $m/z$  value of cryptomaldamide ( $[M + H]^+$   $m/z$  400)  
3 obtained from *M. producens* (Figure 4A and B). Moreover, the MS/MS fragmentation pattern  
4 matched the previously reported fragmentation pattern of cryptomaldamide (Figure 4B).<sup>16</sup> These  
5 data provided preliminary confirmation of heterologous production of cryptomaldamide in  
6 *Anabaena*.  
7

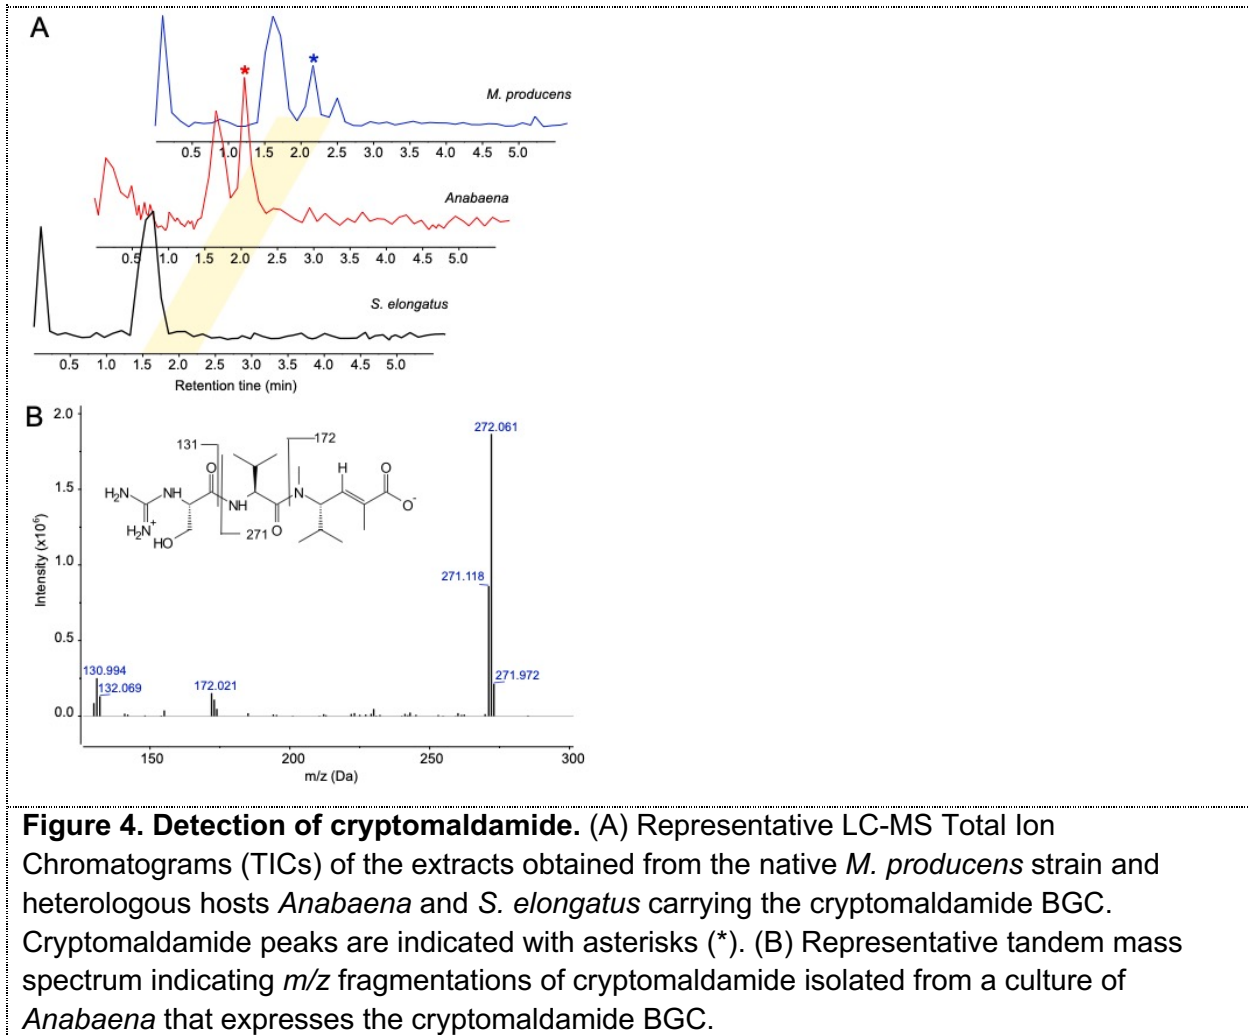

**Figure 4. Detection of cryptomaldamide.** (A) Representative LC-MS Total Ion Chromatograms (TICs) of the extracts obtained from the native *M. producens* strain and heterologous hosts *Anabaena* and *S. elongatus* carrying the cryptomaldamide BGC. Cryptomaldamide peaks are indicated with asterisks (\*). (B) Representative tandem mass spectrum indicating  $m/z$  fragmentations of cryptomaldamide isolated from a culture of *Anabaena* that expresses the cryptomaldamide BGC.

8  
9 *Isolation of cryptomaldamide and structure confirmation*

10 Two segregated double recombinant clones of *Anabaena* (AMC2564 and AMC2565) were  
11 each grown as 1.5-L cultures in a 3% CO<sub>2</sub> atmosphere for about 3 weeks until they reached an  
12 OD<sub>750</sub> of 2.3-2.6. To simplify downstream purification steps, the cell biomass was removed from  
13 the growth medium by centrifugation. Half of each culture supernatant was concentrated by  
14 evaporation and the residue was dissolved in MeOH and then dried, resulting in 28 mg of crude

1 organic extract. This extract was fractionated by RP-HPLC to produce 14.6 mg of a pure, white  
2 amorphous solid. The 500 MHz  $^1\text{H}$  NMR spectrum of this purified compound in  $\text{DMSO-}d_6$   
3 matched the reported proton assignments for cryptomaldamide isolated from *M. producens*  
4 (Table S2).<sup>16</sup> Additionally, two singlets at  $\delta_{\text{H}}$  8.03 - 8.09 and a singlet at  $\delta_{\text{H}}$  7.78 were indicative  
5 of the presence of a monosubstituted guanidine group. Taken together, these data confirmed  
6 that cryptomaldamide was being produced in the heterologous host *Anabaena*.  
7

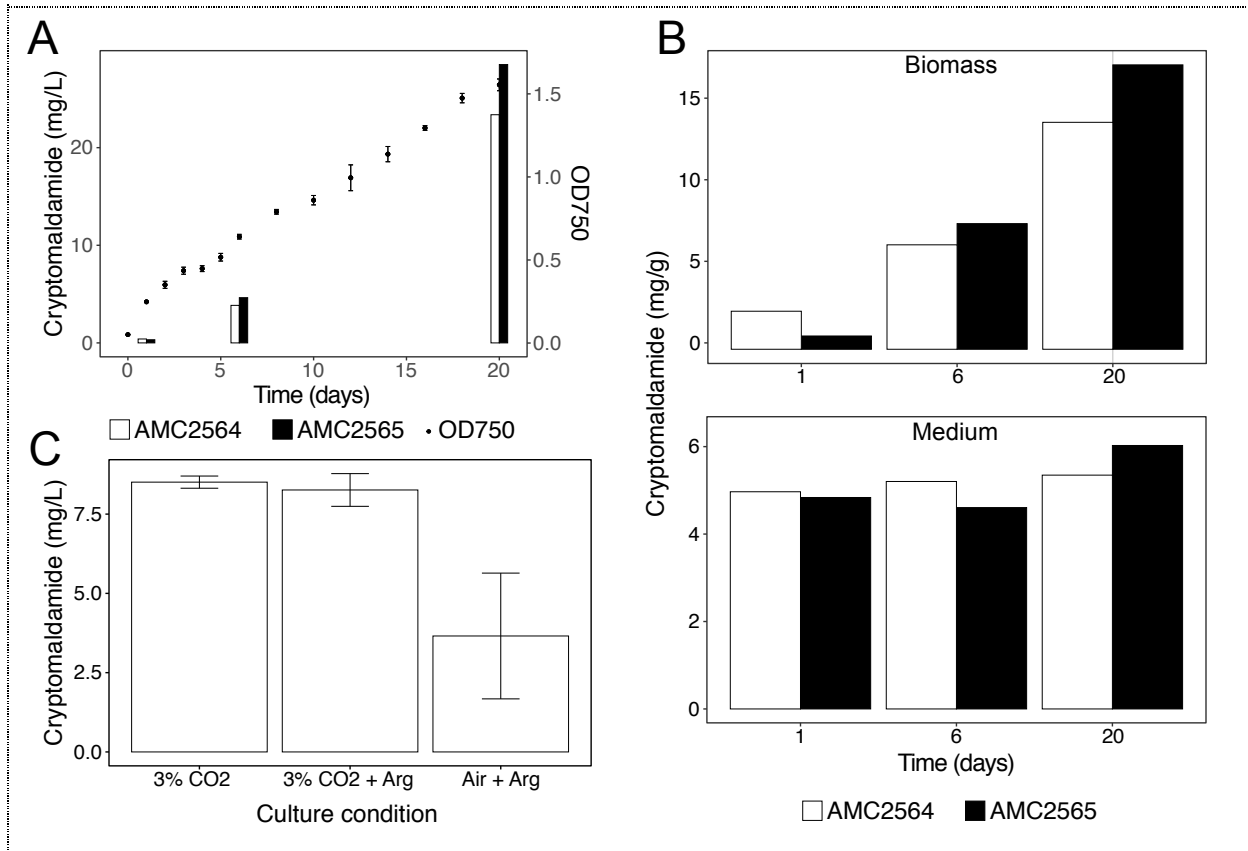

**Figure 5. Production of cryptomaldamide in *Anabaena*.** (A) Total cryptomaldamide concentrations (bars) at 3 time points (1, 6, and 20 days) obtained for cultures (cell biomass + growth medium) of two independent *Anabaena* clones (AMC2564 and AMC2565) that contain the cryptomaldamide BGC, and cell density (dots, OD<sub>750</sub>) over a 20-day time course. 2-L cultures were grown in 2.8-L Fernbach flasks in a 3% CO<sub>2</sub> atmosphere. The OD<sub>750</sub> values are the mean values  $\pm$  standard deviations for the 2 cultures. OD<sub>750</sub> was measured every day for the first 6 days and every 2 days for the rest of the time course. (B) Amount of cryptomaldamide in the biomass and the medium normalized to cell biomass dry weight. The cells and medium were collected on days 1, 6, and 20. (C) Concentration of cryptomaldamide in 50-mL cultures of AMC2565 grown in 125-mL flasks in a 3% CO<sub>2</sub> atmosphere with and without 5 mM arginine and grown in air without supplemental CO<sub>2</sub>. Cultures were grown until the cells reached an OD<sub>750</sub> of approximately 1.5. Cryptomaldamide concentrations were normalized to cell density by dividing by the culture OD<sub>750</sub>. The experiment was carried out in

triplicate for each condition, and cryptomaldamide concentrations are shown as mean values  $\pm$  standard deviations.

1

## 2 *Production of cryptomaldamide over time and under different culture conditions*

3 One of the prominent motivations to produce NPs in a heterologous host is to increase the  
4 supply of compounds for pharmacological testing. Therefore, we evaluated culture conditions,  
5 growth phase, and substrate availability to determine the effects on the amount of  
6 cryptomaldamide produced by *Anabaena*. To quantify cryptomaldamide production, we created  
7 a standard concentration curve using purified cryptomaldamide that had a limit of detection of  
8 1.5 ng and was linear up to 1.56  $\mu$ g (Figure S4).

9 To determine the production of cryptomaldamide over time, *Anabaena* AMC2564 and  
10 AMC2565 were grown in 2-L cultures in a 3% CO<sub>2</sub> atmosphere starting at an OD of 0.05, and  
11 samples were collected after one day (OD<sub>750</sub> ~0.2), 1 week (OD<sub>750</sub> ~0.6), and 3 weeks (OD<sub>750</sub>  
12 ~1.5). Cryptomaldamide was measured from the culture biomass and from the medium (Figure  
13 5A). Cryptomaldamide accumulated in these larger slow-growing cultures over time and  
14 reached a total concentration of 25.9  $\pm$  3.6 mg/L after 3 weeks. The concentration of  
15 cryptomaldamide in the biomass increased over time, starting at less than 1.5  $\pm$  1.0 mg/g dry  
16 weight and increasing to 15.3  $\pm$  2.4 mg/g biomass dry weight after 3 weeks (Figure 5B). In  
17 contrast, the amount of cryptomaldamide in the medium was directly correlated with the cell  
18 biomass at each time point and remained at a little over 5 mg/g biomass dry weight.  
19 Cryptomaldamide accumulated in *Anabaena* cells to higher levels than was released into the  
20 medium. Additional investigation will be required to understand whether the cryptomaldamide in  
21 the medium is actively exported (for example using the MATE protein encoded in the BGC),  
22 passively diffuses into the medium, or is released by lysis of some of the cells. Interestingly, the  
23 amounts of cryptomaldamide in *Anabaena* biomass were approximately 20-fold higher  
24 compared to *M. producens*, which contains 0.7 mg/g dry weight.<sup>16</sup> It took about 3 weeks to  
25 harvest 1.2 gram dry weight of cell biomass per liter from each of the engineered *Anabaena*  
26 AMC2564 and AMC2565 cultures; based on previous studies, we estimate that it would take  
27 about 9 weeks, 3 times longer, to harvest the same amount of biomass of *M. producens* from  
28 laboratory cultures.<sup>61</sup>

29 The first residue to be incorporated by the NRPS portion of the cryptomaldamide  
30 biosynthetic pathway is an amidino-serine residue. The amidinotransferase, CpmA, is proposed  
31 to transfer an amidino group from arginine to serine to form this amidino-serine residue.<sup>16</sup>  
32 Therefore, we investigated if the addition of 5 mM arginine to the medium could increase

1 cryptomaldamide production; however, the production of cryptomaldamide was unchanged  
2 when the engineered *Anabaena* strain AMC2565 was grown in a 3% CO<sub>2</sub> atmosphere with 5  
3 mM arginine (Figure 5C). Therefore, arginine is likely not a limiting substrate for the production  
4 of cryptomaldamide in *Anabaena*; this may be because cyanobacteria store nitrogen as  
5 cyanophycin, a co-polymer of aspartate and arginine,<sup>62</sup> and cells may regulate arginine levels to  
6 maintain its availability. For cultures grown in a 3% CO<sub>2</sub> atmosphere, the 2-L slow-growing  
7 cultures (Figure 5A) produced more cryptomaldamide per volume of culture than did the faster-  
8 growing 50-mL cultures (Figure 5C, left bar) at similar cell densities. This indicates that in the  
9 large cultures, the cells continue to produce and accumulate cryptomaldamide after they have  
10 become light-limited for rapid growth.

11 Cyanobacteria fix CO<sub>2</sub> via photosynthesis for growth, and several studies have shown that  
12 higher growth rates, increased maximum cells densities, and upregulation of secondary  
13 metabolite pathways occur with an increased partial pressure of CO<sub>2</sub>.<sup>18, 63-65</sup> Therefore, we  
14 compared the amount of cryptomaldamide produced in cultures grown in air with cultures in  
15 grown in a chamber with a 3% CO<sub>2</sub> atmosphere. The cultures grown in air took 4 weeks to  
16 reach an OD<sub>750</sub> of ~1.5, whereas the cultures grown in 3% CO<sub>2</sub> grew faster and took only one  
17 week to reach the same density. Both cultures were supplemented with arginine, but as stated  
18 above, we found that arginine addition does not affect cryptomaldamide production. The  
19 production levels of cryptomaldamide in the slower-growing cultures in air were less than half  
20 that of the faster-growing cultures in 3% CO<sub>2</sub> (Figure 5C) showing that incubating cultures with  
21 supplemental CO<sub>2</sub> stimulates cryptomaldamide production.

## 22 **Bioactivity testing of cryptomaldamide produced in *Anabaena***

23 Heterologous production of cryptomaldamide in *Anabaena* increased its availability for  
24 biological activity testing. Inspired by recent discoveries of novel NPs with guanidine groups that  
25 have antimicrobial activity,<sup>66</sup> growth inhibition assays with cryptomaldamide against *Candida*  
26 *albicans*, *Bacillus subtilis*, and *Pseudomonas aeruginosa* were performed. However, there was  
27 no growth inhibition by cryptomaldamide at amounts up to 0.5 mg per disc (data not shown).  
28 Similarly, cryptomaldamide was previously reported to have no effect against H460 human lung  
29 cancer cells and had no blocking effects of the mammalian voltage gated sodium channel  
30 Nav1.4.<sup>16</sup>

## 32 **Conclusions**

33 The marine environment provides a particularly rich source of biologically active NPs as  
34 well as their associated BGCs.<sup>67</sup> Hundreds of PKS/NRPS BGCs have been identified in



1 cyanobacterial genomes<sup>21</sup>, including marine strains such as *M. producens*.<sup>4</sup> However, in  
2 laboratory cultures, the encoded NPs are often produced in small quantities, and moreover,  
3 many of the BGCs are silent.<sup>68</sup> Genetic studies of these BGCs would enable further  
4 interrogation of their regulation and the biosynthetic mechanisms that underlie the production of  
5 specific compounds; however, most cyanobacterial strains, including marine "super producer"  
6 strains, are not genetically tractable.<sup>56</sup> As is true for other microorganisms, the heterologous  
7 expression of cyanobacterial NPs is therefore a promising approach to answer such  
8 limitations.<sup>22</sup>

9 The polyketide–peptide hybrid natural product cryptomaldamide was discovered in the  
10 marine cyanobacterium *M. producens* using MALDI analysis and characterized by 2D NMR and  
11 other spectroscopic and chromatographic methods.<sup>16</sup> By heterologous expression in *Anabaena*,  
12 we have experimentally confirmed that a putative 28.7-kb BGC proposed by Kinnel et al.<sup>16</sup> to  
13 encode for cryptomaldamide biosynthesis is responsible for its production. These results further  
14 validate *Anabaena* as a heterologous platform for the production of cyanobacterial NPs, as was  
15 previously demonstrated for the production of the non-ribosomal peptide-terpene compound  
16 lyngbyatoxin A in *Anabaena*.<sup>32</sup>

17 Many drugs and drug leads are NPs, NP derivatives, or NP-inspired molecules.<sup>9</sup>  
18 Actinobacteria and more recently myxobacteria from terrestrial and aquatic ecosystems have  
19 been important sources of NPs with a broad range of biological activities.<sup>69, 70</sup> Marine  
20 cyanobacteria are also a substantial source of NPs. Hundreds of NP compounds have been  
21 identified from cyanobacteria but their exploitation as drugs is still largely untapped because of  
22 limited availability of the compounds. The mechanisms of action and applications of only a few  
23 cyanobacterial NPs have been more deeply investigated. These include a few potent cancer cell  
24 cytotoxins such as curacin A, which is a microtubule polymerization inhibitor, apratoxin A, which  
25 prevents the biogenesis of secretory and membrane proteins, and dolastatin 10 that has been  
26 modified to be the warhead of an antibody drug conjugate that is FDA approved.<sup>71, 72 73, 74</sup>  
27 Indeed, the slow growth rate and lack of genetic tractability of marine cyanobacteria have limited  
28 the development of their NPs by the pharmaceutical industry. The heterologous expression of  
29 NP BGCs from marine cyanobacteria in *Anabaena* is an important method for the discovery and  
30 development of valuable NPs. The well-developed genetic methods available for *Anabaena* will  
31 facilitate a better understanding of NP gene regulation and evolution, and enable studies of  
32 enzymatic mechanisms and biosynthesis. The success expressing cryptomaldamide in a  
33 heterologous host is an important step in developing high-throughput technologies for  
34 cyanobacterial NP exploration, production, and downstream analysis.



## 1 METHODS

### 2 Plasmid constructions

3 Plasmids and oligonucleotides used in this study are listed in Table S3 and S4,  
4 respectively.

5 PCR amplifications were carried out with Q5 High-Fidelity DNA polymerase (New England  
6 BioLabs) according to the manufacturer's instructions. Plasmid preparations were performed  
7 using the QIAprep Spin Miniprep Kit (Qiagen). Restriction digests followed the supplier's  
8 recommendations but with longer incubation times to assure complete digests. DNA  
9 purification/concentration following PCR and restriction digests were performed with DNA Clean  
10 & Concentrator TM-5 (Zymo). Nucleic acid concentrations were measured with a NanoDrop  
11 2000c spectrophotometer. Cloning in *E. coli* was carried out by restriction/ligation with NEB  
12 Quick Ligase following the manufacturer instructions or by Gibson assembly using the GeneArt  
13 Seamless Cloning and Assembly Kit (Thermo Fisher) as described previously.<sup>48</sup>  
14 Transformation-associated recombination cloning in the yeast *Saccharomyces cerevisiae* was  
15 performed using 500 ng of plasmid backbone linearized with XhoI and NdeI and PCR products  
16 in equimolar ratios following previously published protocols.<sup>75, 76</sup>

17 To make pAM5273, pCVD022 was digested with PciI and AflIII, the yeast element  
18 ARSH/CEN6 was PCR amplified from pCAP03-acc(3)-IV with the primer pair S7942NS-Yeast-  
19 F/S7942NS-Yeast-R, then the resulting DNA fragments were assembled by seamless cloning.  
20 To make pAM5276, pCVD015 was digested with Swal, a DNA fragment that contains the *adh*  
21 promoter and the *ura3* gene was PCR amplified from pCAP03-acc(3)-IV, then the resulting DNA  
22 fragments were assembled by seamless cloning. To make pAM5277, the EcoRV site in the *ura3*  
23 gene was edited by quick change PCR of pAM5276 using the complementary primers *ura3*-  
24 t189c-F and *ura3*-t189c-R. To make pAM5601, pAM5372 was digested with EcoRI and SbfI, the  
25 *hetI* (all5359) gene was PCR amplified from *Anabaena* PCC 7120 gDNA with the primer pair  
26 pAM5372\_A7120\_hetI\_2F/pAM5372\_A7120\_hetI\_583R, then the resulting DNA fragments  
27 were assembled by seamless cloning. To make pAM5564, pAM5571 was digested with XhoI  
28 and NdeI, the cryptomaldamide BGC was PCR amplified from *M. producens* gDNA as 3  
29 fragments with the primer pairs P100F/P100R, P101F/P101R, P102F/P102R, then the resulting  
30 DNA fragments were assembled by TAR cloning in *S. cerevisiae*. To make pAM5565, pAM5572  
31 was digested with AarI, the DNA fragment coding for the crRNA was obtained by annealing the  
32 phosphorylated oligonucleotides NT\_U248F and NT\_U228R, then cloned into pAM5572 by  
33 ligation. To make pAM5569, pER015 was digested with XbaI and NheI, a DNA fragment that  
34 contains the *S. elongatus* NS2 homology sequences flanking a nourseothricin resistance gene

1 was PCR amplified from pAM5544 with the primer pairs  
2 A7120NS2xS7942NS2LAF/A7120NS2xS7942NS2RAR, and then the resulting DNA fragments  
3 were assembled by seamless cloning. To make pAM5571, pAM5273 was digested with Zral to  
4 obtain DNA a fragment that contains the *S. elongatus* NS2 homology sequences and yeast  
5 elements, pCVD003 was digested with EcoRV to obtain the *aphI* gene, and pAM5277 was  
6 digested with EcoRV to obtain the *Padh-ura3* cloning module, and then the resulting DNA  
7 fragments were assembled by seamless cloning. To make pAM5572, pAM5406 was digested  
8 with Zral to obtain the modified RSF1010 replicon, pCVD002 was digested with EcoRV to obtain  
9 the *aadA* gene, and pAM5600 was digested with EcoRV to obtain the *cpf1*/CRISPR module,  
10 and then the resulting DNA fragments were assembled by seamless cloning. To make  
11 pAM5600, the *cpf1*/CRISPR system from pSL2680 was digested with PstI and Sall, the  
12 backbone of pCVD015 was PCR amplified from pCVD015 with the primer pair  
13 pCVD015\_1684F/pCVD015\_3464R and digested with PstI and Sall, and then the resulting DNA  
14 fragments were assembled by seamless cloning.

15 Plasmid constructs were verified by restriction digests, and DNA fragments produced by  
16 PCR were sequence-verified by Sanger sequencing. Six independent plasmid clones carrying  
17 the cryptomaldamide BGC were sequenced entirely by next-generation sequencing on a MiSeq  
18 platform.

### 19 **Strain construction and culture conditions**

20 Cyanobacterial strains used in this study are listed in Table S5.

21 Plasmid DNA was introduced into *S. elongatus* AMC2302, which has been cured of the  
22 endogenous pANS plasmid, by natural transformation using standard protocols.<sup>46</sup> Recombinant  
23 DNA carrying the cryptomaldamide BGC and an antibiotic resistance marker were integrated  
24 into the chromosome at neutral site 2 (NS2).<sup>46</sup> Recombinant DNA carrying an Sfp-PPTase and  
25 an antibiotic resistance gene were integrated into the chromosome at NS3<sup>77</sup> or carried on a  
26 replicative plasmid derived from the *S. elongatus* small plasmid pANS.<sup>48</sup> For *Anabaena*,  
27 recombinant DNA was introduced into cells by biparental conjugations from *E. coli* following  
28 published protocols.<sup>78, 79</sup>

29 To construct *Anabaena* strain AMC2556, which contains the *S. elongatus* NS2 neutral site  
30 in the chromosome, recombinant DNA carrying *S. elongatus* NS2 homology regions flanking a  
31 Nt<sup>R</sup> gene (pAM5569) was integrated into the all1697 gene<sup>57</sup> in the *Anabaena* PCC 7120  
32 chromosome. We named this neutral site A7120NS2. To obtain segregated double recombinant  
33 strains after conjugation of pAM5569, which carries a *sacB* gene on its backbone, isolated  
34 colonies were pooled, and several dilutions of the mixture were plated onto BG-11 plates

1 supplemented with 5% sucrose. Several isolated colonies were further grown as small patches  
2 on fresh plates and segregation was verified by PCR. One segregated strain was archived as  
3 strain AMC2556.

4 Plasmid pAM5564, which carries the cryptomaldamide BGC, was conjugated into  
5 *Anabaena* AMC2556 and 3 independent neomycin resistant (Nm<sup>R</sup>) clones were selected:  
6 AMC2560, AMC2561, and AMC2562. To obtain segregated double recombinant clones of  
7 *Anabaena* carrying the cryptomaldamide BGC in the A7120NS2 neutral site, pAM5565, which  
8 was designed to cleave the Nt<sup>R</sup> gene in AMC2556 and providing spectinomycin and  
9 streptomycin resistance (Sp<sup>R</sup> + Sm<sup>R</sup>), was conjugated into AMC2560. Then, isolated colonies  
10 (Nm<sup>R</sup>, Sp<sup>R</sup> + Sm<sup>R</sup>) were counter screened on plates with Nt, and 3 clones that did not grow in  
11 the presence of Nt were grown as small cultures in BG-11 with Nm. Finally, to obtain strains that  
12 had lost pAM5565, aliquots of these cultures were spread on plates with Nm, isolated colonies  
13 were counter screened on plates with Sp + Sm and for each clone, one colony that did not grow  
14 in the presence of Sp + Sm was verified by PCR (Figure S3).

15 *E. coli* strains were grown at 37 °C in LB broth or on agar plates supplemented with  
16 appropriate antibiotics. *S. cerevisiae* VL6-48N strains were grown at 30 °C in YPD medium  
17 supplemented with 100 mg/L adenine in broth culture or on agar (2%) plates. Cyanobacterial  
18 strains were grown in BG-11 medium<sup>80</sup> as liquid cultures at 30 °C with continuous shaking or on  
19 agar plates (40 mL, 1.5% agar). *S. elongatus* was grown with continuous illumination of 300  
20  $\mu\text{mol photons m}^{-2} \text{ s}^{-1}$  and *Anabaena* was grown with 70  $\mu\text{mol photons m}^{-2} \text{ s}^{-1}$ . Cultures were  
21 grown in air with fluorescent cool white bulbs as the light source. Culture media for recombinant  
22 cyanobacterial strains were supplemented with appropriate antibiotics: for *S. elongatus*,  
23 kanamycin (5  $\mu\text{g/mL}$ ) and chloramphenicol (7.5  $\mu\text{g/mL}$ ); and for *Anabaena*, neomycin (12.5-25  
24  $\mu\text{g/mL}$ ) and nourseothricin (25  $\mu\text{g/mL}$ ).

## 25 **RT-qPCR**

26 Four independent cultures of *S. elongatus* carrying the cryptomaldamide pathway and the  
27 host strain AMC2556 were grown until they reached an OD<sub>750</sub> of ~0.5. Cell collection, RNA  
28 extraction, cDNA synthesis, and qPCR were performed as described previously.<sup>43</sup> Primer  
29 sequences and target genes are listed in Table S4.

## 30 **MALDI analysis of *S. elongatus* cultures**

31 Cell pellets collected from 1 mL of liquid culture or scraped from a small patch (~0.5 cm<sup>2</sup>) of  
32 cells grown on agar plates were resuspended in 50  $\mu\text{L}$  of BG-11 medium. A 0.5  $\mu\text{L}$  aliquot of the  
33 suspended cells were then mixed with 0.5  $\mu\text{L}$  of matrix solution (acetonitrile(ACN): trifluoroacetic  
34 acid(TFA) 78:0.1 saturated with universal matrix from Sigma) onto a MALDI MSP 96 anchor

1 plate (Bruker Daltonics). The plate was then air-dried for 30 minutes at room temperature and  
2 then analyzed by MALDI-TOF mass spectrometry on a Bruker Daltonics Microflex system. The  
3 data were analyzed with the MALDIquant and MALDIquantForeign packages using custom  
4 scripts written in R.<sup>81</sup>

## 5 **Extraction, identification, characterization, and quantification of cryptomaldamide**

### 6 *Preliminary identification*

7 Cultures of *S. elongatus* and *Anabaena* were grown in 150 mL of medium in 250-mL Falcon  
8 tissue culture flasks bubbled with air (0.1 L/min). Cultures were typically started at an OD<sub>750</sub> of  
9 0.05-0.1 and grown until they reached an OD<sub>750</sub> of ~1. To collect samples, cells were pelleted by  
10 centrifugation at 4,500 g and the supernatants and cell pellets were frozen at -80°C or  
11 processed immediately for chemical analysis. The cell pellets were extracted in 100% ethanol 3  
12 times, then the crude extract was evaporated and redissolved in methanol for LC-MS analysis.  
13 The growth medium was liquid-liquid extracted three times with 250 ml of n-butanol and both the  
14 aqueous layer and organic layers were evaporated and dissolved into methanol for LC-MS  
15 analyses.

### 16 *Isolation and characterization*

17 To obtain larger amounts of cryptomaldamide from *Anabaena* AMC2464 and AMC2465,  
18 these strains were grown as 1.5-L cultures in 2.8-L Fernbach flasks on an orbital shaker at 125  
19 rpm in a chamber with a 3% CO<sub>2</sub> atmosphere. The cultures were inoculated at an OD<sub>750</sub> of 0.02  
20 and grown for 23 days until they reached an OD<sub>750</sub> of 2.3 and 2.6. As the cultures became  
21 denser, the light intensity was progressively increased from 40 to 200  $\mu\text{mol photon m}^{-2} \text{s}^{-1}$ . The  
22 light source was natural white light LED strips (4000 – 4500 K).

23 Both cultures were centrifuged, and the growth medium was evaporated to give a crude  
24 product composed of salts and organic compounds. This crude product was dissolved in  
25 methanol and centrifuged for 5 minutes at 12,000 rpm. The supernatant was then subjected to  
26 purification using semi-preparative HPLC with a reverse phase gradient (5% ACN/H<sub>2</sub>O to 14.1%  
27 ACN/H<sub>2</sub>O for 6 minutes followed by an isocratic phase at 14.1% ACN/H<sub>2</sub>O for 6.75 minutes, at  
28 which time cryptomaldamide eluted as a single peak (Phenomenex Aqua Kinetex 5 $\mu$  C18 125Å,  
29 250 x 4.00 mm, 2.5 mL/min). Pure cryptomaldamide was analyzed by <sup>1</sup>H NMR using a JEOL  
30 ECZ500R NMR operating at 500 MHz with the samples dissolved in DMSO-*d*<sub>6</sub>.

### 31 *Quantification of cryptomaldamide*

32 To determine the amount of cryptomaldamide produced over time, AMC2464 and  
33 AMC2465 were grown as described above except both strains were grown as 2 L cultures with  
34 a light intensity of 80  $\mu\text{mol photon m}^{-2} \text{s}^{-1}$ . At three time points, 200 mL aliquots were collected,

1 the cells were collected by centrifugation and placed at  $-80\text{ }^{\circ}\text{C}$ . The growth medium supernatant  
2 was kept at  $4\text{ }^{\circ}\text{C}$  in the dark until analysis. A 1 mL aliquot of the growth medium was partially  
3 cleaned by purification over C-18 SPE columns using 1 additional milliliter of MeOH to elute  
4 samples directly into LC-MS vials. LC-MS analyses were then conducted in triplicate for each  
5 vial. The cell pellets were lyophilized and weighed, and then extracted 3 times using 100%  
6 ethanol. The solvent in these crude extracts was evaporated, and the samples redissolved in  
7 methanol for LC-MS analyses using a Finnigan LCQ Linear Ion Trap LC/MS/MS instrument.

8 To determine the amount of cryptomaldamide produced under the different culture  
9 conditions, AMC2465 was grown as 50 mL cultures with or without 5 mM arginine in 125 mL  
10 flasks. One set of cultures was grown in air and another set of cultures was grown in a 3%  $\text{CO}_2$   
11 atmosphere. All cultures were grown in triplicate. Preliminary experiments indicated that one  
12 freeze/thaw cycle of a culture of *Anabaena* led to the complete release of cryptomaldamide into  
13 the medium from the lysed cells, leaving no trace of cryptomaldamide in the biomass.  
14 Therefore, all culture samples were frozen and at the time of analysis, the culture samples were  
15 thawed, and the cell debris was removed by centrifugation. The supernatant was then  
16 processed similarly to the growth medium as described above for the LC-MS analyses.

17 Cryptomaldamide was quantified in the samples using a standard curve. The protonated  
18 molecular ion peak  $[\text{M} + \text{H}]^+$  at  $m/z$  400.25 was used for quantification. A series of 1:2 dilutions  
19 starting with 50  $\mu\text{g}$  of cryptomaldamide down to a 1.5 ng were analyzed by LC-MS and the area  
20 under the curve (AUC) for each sample was measured. Serial dilutions and LC-MS analyses  
21 were performed in duplicate and a linear regression was used to fit a standard curve to the  
22 averaged values within the limits of linearity (Figure S4).

### 23 *General procedures*

24 Chemical reagents were purchased from Acros, Fluka, Sigma-Aldrich, or TCI. Deuterated  
25 NMR solvents were purchased from Cambridge Isotope Laboratories.  $^1\text{H}$  NMR spectra were  
26 collected on a JEOL ECZ 500 NMR spectrometer equipped with a 3 mm inverse detection  
27 probe. NMR spectra were referenced to residual solvent DMSO signals ( $\delta$  H 2.50 ppm and  $\delta$  C  
28 39.52 ppm as internal standards). The NMR spectra were processed using MestReNova  
29 (Mnova 12.0, Mestrelab Research). Each crude and pure sample was injected and analyzed via  
30 LC-MS/MS on a Thermo Finnigan Surveyor Autosampler-Plus/LC-MS/MS/PDA-Plus system  
31 coupled to a Thermo Finnigan LCQ Advantage Max mass spectrometer with a 10 minute  
32 gradient of 30 – 100%  $\text{CH}_3\text{CN}$  in water with 0.1% formic acid in positive mode (Kinetex  $5\mu$  C18  
33 100Å, 100 x 4.60 mm, 0.6 mL/min). The ion trap mass spectrometry raw data (.RAW) were  
34 converted to the  $m/z$  extensible markup language (.mzXML) with MSConvert (v 3.0.19) and

1 uploaded to GNPS.<sup>82</sup> Spectral library search was performed against available public libraries  
2 and NIST17. The spectra for cryptomaldamide were annotated in the GNPS spectral library  
3 (<https://gnps.ucsd.edu/>) (accession number: CCMSLIB00005724004).

#### 4 **Biological assays**

5 *Bacillus subtilis*, *Pseudomonas aeruginosa*, and *Candida albicans* were streaked on LB  
6 agar or Sabouraud dextrose (SD) agar (for *C. albicans*). After 24 hours, 3 isolated colonies from  
7 each plate were grown in LB or SD broth until they reached 0.5 McFarland turbidity standard.  
8 Microbial suspensions (25  $\mu$ L per plate) were then spread on LB or SD agar plates. Six 6 mm  
9 Whatman paper disks containing purified cryptomaldamide or solvent controls were evenly  
10 distributed onto each plate. The paper disks were loaded with 50, 200, or 500  $\mu$ g of  
11 cryptomaldamide from a 0.5 mg/mL stock solution; a maximum of 200  $\mu$ L were added at a time  
12 and dried before a subsequent 200  $\mu$ L volume or smaller was added. All the paper disks were  
13 dried in a fume hood before application to the test plates. Disks treated with pure MeOH or no  
14 treatment at all were used as negative controls. BD BBL Sensi Discs with 10  $\mu$ g of streptomycin  
15 were used as positive controls. The plates were incubated at 30°C for 24 hours at which time  
16 zones of inhibition were measured as the diameter of the ring around the disk where microbial  
17 growth was absent.

18



1 **AUTHOR INFORMATION**

2 *Corresponding Author(s)*

3 \*E-mail: [jwgolden@ucsd.edu](mailto:jwgolden@ucsd.edu)

4 ORCID

5 Arnaud Taton: 0000-0001-5494-5964

6 James W. Golden: 0000-0001-5463-3207

7 William H. Gerwick: 0000-0003-1403-4458

8 Lena Gerwick: 0000-0001-6108-9000

9 Raphael Reher: 0000-0002-5858-1173

10 Andrew Ecker: 0000-0001-7331-0825

11 Ryan Simkovsky: 0000-0001-6837-0460

12 Brooke Anderson: 0000-0002-9919-1390

13 Brienna Diaz: 0000-0003-4358-9727

14 Tiago F. Leao: 0000-0003-1034-9153

15 Pieter C. Dorrestein: 0000-0002-3003-1030

16

17 *Author Contribution*

18 A.T., J.W.G., L.G., and W.H.G. conceived the project. A.T., B.D., B.A., and N.A.M.  
19 constructed the recombinant plasmids and strains. A.T. and N.A.M. performed MALDI analyses.  
20 A.E. and R.R. performed LC-MS/MS and NMR analyses. A.T. performed RT-qPCR  
21 experiments. A.E. performed the bioassays. T.F.L. and N.A.M. provided the BGC identification.  
22 P.C.D. provided laboratory support for MALDI analysis. R.S. provided MALDI analytical scripts.  
23 A.T., A.E., J.W.G, L.G., and W.H.G. analyzed the data and wrote the paper, which was  
24 reviewed and edited by all authors.

25 *Conflict of Interest*

26 W.H.G. has an equity interest in Sirenas Marine Discovery, Inc., a company that may  
27 potentially benefit from the research results, and also serves on the company's Scientific  
28 Advisory Board. The terms of this arrangement have been reviewed and approved by the  
29 University of California, San Diego in accordance with its conflict of interest policies.

30 **ACKNOWLEDGMENTS**

31 We thank K. Jepsen at the UC San Diego IGM sequencing facility for technical support. We  
32 thank B.S. Moore for providing pCAP03 and *S. cerevisiae* VL6-48N, and X. Tang for protocols  
33 and tips on TAR cloning. We thank E. Glukhov for maintaining the laboratory culture of *M.*  
34 *produces*. We thank A. M. Caraballo for assistance with MALDI analyses. We thank T.



1 Gilderman, D. Genuário, and C. Peterson for assistance with plasmid and strain construction,  
2 and S.S. Golden for general laboratory financial support. Funding was provided by the National  
3 Institute of General Medical Sciences of the National Institutes of Health under award number  
4 R01GM118815 (J.W.G., L.G., and W.H.G.) and the Department of Energy under award number  
5 DE-EE0007094 (R.S.). The content is solely the responsibility of the authors and does not  
6 necessarily represent the official views of the National Institutes of Health.  
7

## 1 REFERENCES

- 2 1. Demay, J.; Bernard, C.; Reinhardt, A.; Marie, B., Natural products from cyanobacteria:  
3 Focus on beneficial activities. *Marine Drugs* **2019**, *17* (6), 320.
- 4 2. Kleigrew, K.; Gerwick, L.; Sherman, D. H.; Gerwick, W. H., Unique marine derived  
5 cyanobacterial biosynthetic genes for chemical diversity. *Nat Prod Rep* **2016**, *33* (2), 348-  
6 364.
- 7 3. Bullerjahn, G. S.; McKay, R. M.; Davis, T. W.; Baker, D. B.; Boyer, G. L.; D'Anglada, L. V.;  
8 Doucette, G. J.; Ho, J. C.; Irwin, E. G.; Kling, C. L.; Kudela, R. M.; Kurmayer, R.; Michalak,  
9 A. M.; Ortiz, J. D.; Otten, T. G.; Paerl, H. W.; Qin, B.; Sohngen, B. L.; Stumpf, R. P.; Visser,  
10 P. M.; Wilhelm, S. W., Global solutions to regional problems: Collecting global expertise to  
11 address the problem of harmful cyanobacterial blooms. A Lake Erie case study. *Harmful*  
12 *Algae* **2016**, *54*, 223-238.
- 13 4. Leao, T.; Castelao, G.; Korobeynikov, A.; Monroe, E. A.; Podell, S.; Glukhov, E.; Allen, E. E.;  
14 Gerwick, W. H.; Gerwick, L., Comparative genomics uncovers the prolific and distinctive  
15 metabolic potential of the cyanobacterial genus *Moorea*. *Proc Natl Acad Sci U S A* **2017**,  
16 *114* (12), 3198-3203.
- 17 5. Dittmann, E.; Gugger, M.; Sivonen, K.; Fewer, D. P., Natural product biosynthetic diversity  
18 and comparative genomics of the cyanobacteria. *Trends Microbiol* **2015**, *23* (10), 642-652.
- 19 6. Shih, P. M.; Wu, D.; Latifi, A.; Axen, S. D.; Fewer, D. P.; Talla, E.; Calteau, A.; Cai, F.;  
20 Tandeau de Marsac, N.; Rippka, R.; Herdman, M.; Sivonen, K.; Coursin, T.; Laurent, T.;  
21 Goodwin, L.; Nolan, M.; Davenport, K. W.; Han, C. S.; Rubin, E. M.; Eisen, J. A.; Woyke, T.;  
22 Gugger, M.; Kerfeld, C. A., Improving the coverage of the cyanobacterial phylum using  
23 diversity-driven genome sequencing. *Proc Natl Acad Sci U S A* **2013**, *110* (3), 1053-1058.
- 24 7. Puglisi, M. P.; Sneed, J. M.; Ritson-Williams, R.; Young, R., Marine chemical ecology in  
25 benthic environments. *Nat Prod Rep* **2019**, *36* (3), 410-429.
- 26 8. Liaimer, A.; Helfrich, E. J.; Hinrichs, K.; Guljamow, A.; Ishida, K.; Hertweck, C.; Dittmann, E.,  
27 Nostopeptolide plays a governing role during cellular differentiation of the symbiotic  
28 cyanobacterium *Nostoc punctiforme*. *Proc Natl Acad Sci U S A* **2015**, *112* (6), 1862-1867.
- 29 9. Newman, D. J.; Cragg, G. M., Natural products as sources of new drugs over the nearly four  
30 decades from 01/1981 to 09/2019. *J Nat Prod* **2020**, (3), 770-803.
- 31 10. Ramaswamy, A. V.; Flatt, P. M.; Edwards, D. J.; Simmons, T. L.; Han, B.; Gerwick, W. H.,  
32 Frontiers in marine biotechnology. Proksch, P.; Muller, E. G., Eds. Horizon Bioscience:  
33 Norwich, U.K., 2006; pp 175-224.
- 34 11. Choi, H.; Pereira, A. R.; Gerwick, W. H., The chemistry of marine algae and cyanobacteria.  
35 In *Handbook of Marine Natural Products*, Springer Netherlands: Dordrecht, 2012; pp 55-  
36 152.
- 37 12. Gerwick, W. H.; Coates, R. C.; Engene, N.; Gerwick, L.; Grindberg, R. V.; Jones, A. C.;  
38 Sorrels, C. M., Giant marine cyanobacteria produce exciting potential pharmaceuticals.  
39 *Microbe* **2008**, *3* (6), 277-288.
- 40 13. Villa, F. A.; Lieske, K.; Gerwick, L., Selective MyD88-dependent pathway inhibition by the  
41 cyanobacterial natural product malyngamide F acetate. *Eur J Pharmacol* **2010**, *629* (1-3),  
42 140-146.
- 43 14. Balskus, E. P.; Walsh, C. T., The genetic and molecular basis for sunscreen biosynthesis in  
44 cyanobacteria. *Science* **2010**, *329* (5999), 1653-1656.
- 45 15. Proteau, P. J.; Gerwick, W. H.; Garcia-Pichel, F.; Castenholz, R., The structure of  
46 scytonemin, an ultraviolet sunscreen pigment from the sheaths of cyanobacteria.  
47 *Experientia* **1993**, *49* (9), 825-829.
- 48 16. Kinnel, R. B.; Esquenazi, E.; Leao, T.; Moss, N.; Mevers, E.; Pereira, A. R.; Monroe, E. A.;  
49 Korobeynikov, A.; Murray, T. F.; Sherman, D.; Gerwick, L.; Dorrestein, P. C.; Gerwick, W.  
50 H., A maldiisotopic approach to discover natural products: Cryptomaldamide, a hybrid

- 1 tripeptide from the marine cyanobacterium *Moorea producens*. *J Nat Prod* **2017**, *80* (5),  
2 1514-1521.
- 3 17. Guljamow, A.; Kreische, M.; Ishida, K.; Liaimer, A.; Altermark, B.; Bahr, L.; Hertweck, C.;  
4 Ehwald, R.; Dittmann, E., High-density cultivation of terrestrial *Nostoc* strains leads to  
5 reprogramming of secondary metabolome. *Appl Environ Microbiol* **2017**, *83* (23), e01510-  
6 01517.
- 7 18. Dehm, D.; Krumbholz, J.; Baunach, M.; Wiebach, V.; Hinrichs, K.; Guljamow, A.; Tabuchi,  
8 T.; Jenke-Kodama, H.; Süssmuth, R. D.; Dittmann, E., Unlocking the spatial control of  
9 secondary metabolism uncovers hidden natural product diversity in *Nostoc punctiforme*.  
10 *ACS chemical biology* **2019**, *14* (6), acschembio.9b00240-1279.
- 11 19. Jones, A. C.; Monroe, E. A.; Eisman, E. B.; Gerwick, L.; Sherman, D. H.; Gerwick, W. H.,  
12 The unique mechanistic transformations involved in the biosynthesis of modular natural  
13 products from marine cyanobacteria. *Nat Prod Rep* **2010**, *27* (7), 1048-1065.
- 14 20. Winnikoff, J. R.; Glukhov, E.; Watrous, J.; Dorrestein, P. C.; Gerwick, W. H., Quantitative  
15 molecular networking to profile marine cyanobacterial metabolomes. *J Antibiot (Tokyo)*  
16 **2014**, *67* (1), 105-112.
- 17 21. Calteau, A.; Fewer, D. P.; Latifi, A.; Coursin, T.; Laurent, T.; Jokela, J.; Kerfeld, C. A.;  
18 Sivonen, K.; Piel, J.; Gugger, M., Phylum-wide comparative genomics unravel the diversity  
19 of secondary metabolism in Cyanobacteria. *BMC Genomics* **2014**, *15* (1), 977.
- 20 22. Zhang, J. J.; Tang, X.; Moore, B. S., Genetic platforms for heterologous expression of  
21 microbial natural products. *Nat Prod Rep* **2019**, *36* (9), 1313-1332.
- 22 23. Donia, M. S.; Hathaway, B. J.; Sudek, S.; Haygood, M. G.; Rosovitz, M. J.; Ravel, J.;  
23 Schmidt, E. W., Natural combinatorial peptide libraries in cyanobacterial symbionts of  
24 marine ascidians. *Nature chemical biology* **2006**, *2* (12), 729-735.
- 25 24. Long, P. F.; Dunlap, W. C.; Battershill, C. N.; Jaspars, M., Shotgun cloning and  
26 heterologous expression of the patellamide gene cluster as a strategy to achieving  
27 sustained metabolite production. *Chembiochem* **2005**, *6* (10), 1760-1765.
- 28 25. Schmidt, E. W.; Nelson, J. T.; Rasko, D. A.; Sudek, S.; Eisen, J. A.; Haygood, M. G.; Ravel,  
29 J., Patellamide A and C biosynthesis by a microcin-like pathway in *Prochloron didemni*, the  
30 cyanobacterial symbiont of *Lissoclinum patella*. *Proc Natl Acad Sci U S A* **2005**, *102* (20),  
31 7315-7320.
- 32 26. Ziemert, N.; Ishida, K.; Weiz, A.; Hertweck, C.; Dittmann, E., Exploiting the natural diversity  
33 of microviridin gene clusters for discovery of novel tricyclic depsipeptides. *Appl Environ*  
34 *Microbiol* **2010**, *76* (11), 3568-3574.
- 35 27. Ongley, S. E.; Bian, X.; Neilan, B. A.; Muller, R., Recent advances in the heterologous  
36 expression of microbial natural product biosynthetic pathways. *Nat Prod Rep* **2013**, *30* (8),  
37 1121-1138.
- 38 28. Ongley, S. E.; Bian, X.; Zhang, Y.; Chau, R.; Gerwick, W. H.; Muller, R.; Neilan, B. A., High-  
39 titer heterologous production in *E. coli* of lnygbyatoxin, a protein kinase C activator from an  
40 uncultured marine cyanobacterium. *ACS Chem Biol* **2013**, *8* (9), 1888-1893.
- 41 29. Liu, T.; Mazmouz, R.; Ongley, S. E.; Chau, R.; Pickford, R.; Woodhouse, J. N.; Neilan, B. A.,  
42 Directing the heterologous production of specific cyanobacterial toxin variants. *ACS Chem*  
43 *Biol* **2017**, *12* (8), 2021-2029.
- 44 30. Jones, A. C.; Otilie, S.; Eustaquio, A. S.; Edwards, D. J.; Gerwick, L.; Moore, B. S.;  
45 Gerwick, W. H., Evaluation of *Streptomyces coelicolor* A3(2) as a heterologous expression  
46 host for the cyanobacterial protein kinase C activator lnygbyatoxin A. *FEBS J* **2012**, *279* (7),  
47 1243-1251.
- 48 31. Kim, E. J.; Lee, J. H.; Choi, H.; Pereira, A. R.; Ban, Y. H.; Yoo, Y. J.; Kim, E.; Park, J. W.;  
49 Sherman, D. H.; Gerwick, W. H.; Yoon, Y. J., Heterologous production of 4-O-  
50 demethylbarbamide, a marine cyanobacterial natural product. *Org Lett* **2012**, *14* (23), 5824-  
51 5827.

- 1 32. Videau, P.; Wells, K. N.; Singh, A. J.; Gerwick, W. H.; Philmus, B., Assessment of *Anabaena*  
2 sp. strain PCC 7120 as a heterologous expression host for cyanobacterial natural products:  
3 Production of lymbbyatoxin A. *ACS Synth Biol* **2016**, *5* (9), 978-988.
- 4 33. Videau, P.; Wells, K. N.; Singh, A. J.; Eiting, J.; Proteau, P. J.; Philmus, B., Expanding the  
5 natural products heterologous expression repertoire in the model cyanobacterium *Anabaena*  
6 sp. strain PCC 7120: Production of pendolmycin and teleocidin B-4. *ACS Synth Biol* **2020**, *9*  
7 (1), 63-75.
- 8 34. Tronholm, A.; Engene, N., *Moorena* gen. nov., a valid name for “*Moorea* Engene & al.” nom.  
9 inval. (Oscillatoriaceae, Cyanobacteria). *Notulae Algarum* **2019**, *122*, 1-2.
- 10 35. Engene, N.; Rottacker, E. C.; Kastovsky, J.; Byrum, T.; Choi, H.; Ellisman, M. H.; Komarek,  
11 J.; Gerwick, W. H., *Moorea producens* gen. nov., sp. nov. and *Moorea bouillonii* comb. nov.,  
12 tropical marine cyanobacteria rich in bioactive secondary metabolites. *Int J Syst Evol*  
13 *Microbiol* **2012**, *62* (Pt 5), 1171-1178.
- 14 36. Rossi, J. V.; Roberts, M. A.; Yoo, H. D.; Gerwick, W. H., Pilot scale culture of the marine  
15 cyanobacterium *Lyngbya majuscula* for its pharmaceutically-useful natural metabolite  
16 curacin A. *J Appl Phycol* **1997**, *9* (3), 195-204.
- 17 37. Boudreau, P. D.; Monroe, E. A.; Mehrotra, S.; Desfor, S.; Korobeynikov, A.; Sherman, D. H.;  
18 Murray, T. F.; Gerwick, L.; Dorrestein, P. C.; Gerwick, W. H., Expanding the described  
19 metabolome of the marine cyanobacterium *Moorea producens* JHB through orthogonal  
20 natural products workflows. *PLoS One* **2015**, *10* (7), e0133297.
- 21 38. Holmes, T. C.; May, A. E.; Zaleta-Rivera, K.; Ruby, J. G.; Skewes-Cox, P.; Fischbach, M. A.;  
22 DeRisi, J. L.; Iwatsuki, M.; Omura, S.; Khosla, C., Molecular insights into the biosynthesis of  
23 guadinomine: a type III secretion system inhibitor. *J Am Chem Soc* **2012**, *134* (42), 17797-  
24 17806.
- 25 39. Cohen, S. E.; Golden, S. S., Circadian rhythms in cyanobacteria. *Microbiol Mol Biol Rev*  
26 **2015**, *79* (4), 373-385.
- 27 40. Oliver, N. J.; Rabinovitch-Deere, C. A.; Carroll, A. L.; Nozzi, N. E.; Case, A. E.; Atsumi, S.,  
28 Cyanobacterial metabolic engineering for biofuel and chemical production. *Curr Opin Chem*  
29 *Biol* **2016**, *35*, 43-50.
- 30 41. Broddrick, J. T.; Rubin, B. E.; Welkie, D. G.; Du, N.; Mih, N.; Diamond, S.; Lee, J. J.; Golden,  
31 S. S.; Palsson, B. O., Unique attributes of cyanobacterial metabolism revealed by improved  
32 genome-scale metabolic modeling and essential gene analysis. *Proc Natl Acad Sci U S A*  
33 **2016**, *113* (51), E8344-E8353.
- 34 42. Diamond, S.; Jun, D.; Rubin, B. E.; Golden, S. S., The circadian oscillator in *Synechococcus*  
35 *elongatus* controls metabolite partitioning during diurnal growth. *Proc Natl Acad Sci U S A*  
36 **2015**, *112* (15), E1916-1925.
- 37 43. Taton, A.; Erikson, C.; Yang, Y.; Rubin, B. E.; Rifkin, S. A.; Golden, J. W.; Golden, S. S.,  
38 The circadian clock and darkness control natural competence in cyanobacteria. *Nat*  
39 *Commun* **2020**, *11* (1), 1688.
- 40 44. Tsinoremas, N. F.; Kutach, A. K.; Strayer, C. A.; Golden, S. S., Efficient gene transfer in  
41 *Synechococcus* sp. strains PCC 7942 and PCC 6301 by interspecies conjugation and  
42 chromosomal recombination. *J Bacteriol* **1994**, *176* (21), 6764-6768.
- 43 45. Chen, Y.; Holtman, C. K.; Taton, A.; Golden, S. S., Functional analysis of the  
44 *Synechococcus elongatus* PCC 7942 genome. In *Advances in Photosynthesis and*  
45 *Respiration*, Springer Netherlands: Dordrecht, 2012; Vol. 33, pp 119-137.
- 46 46. Clerico, E. M.; Ditty, J. L.; Golden, S. S., Specialized techniques for site-directed  
47 mutagenesis in cyanobacteria. *Methods Mol Biol* **2007**, *362*, 155-171.
- 48 47. Rubin, B. E.; Wetmore, K. M.; Price, M. N.; Diamond, S.; Shultzaberger, R. K.; Lowe, L. C.;  
49 Curtin, G.; Arkin, A. P.; Deutschbauer, A.; Golden, S. S., The essential gene set of a  
50 photosynthetic organism. *Proc Natl Acad Sci U S A* **2015**, *112* (48), E6634-6643.

- 1 48. Taton, A.; Unglaub, F.; Wright, N. E.; Zeng, W. Y.; Paz-Yepes, J.; Brahamsha, B.; Palenik,  
2 B.; Peterson, T. C.; Haerizadeh, F.; Golden, S. S.; Golden, J. W., Broad-host-range vector  
3 system for synthetic biology and biotechnology in cyanobacteria. *Nucleic Acids Res* **2014**,  
4 42 (17), e136.
- 5 49. Lai, M. C.; Lan, E. I., Advances in metabolic engineering of cyanobacteria for photosynthetic  
6 biochemical production. *Metabolites* **2015**, 5 (4), 636-658.
- 7 50. Roulet, J.; Taton, A.; Golden, J. W.; Arabolaza, A.; Burkart, M. D.; Gramajo, H.,  
8 Development of a cyanobacterial heterologous polyketide production platform. *Metab Eng*  
9 **2018**, 49, 94-104.
- 10 51. Noskov, V. N.; Kouprina, N.; Leem, S. H.; Ouspenski, I.; Barrett, J. C.; Larionov, V., A  
11 general cloning system to selectively isolate any eukaryotic or prokaryotic genomic region in  
12 yeast. *BMC Genomics* **2003**, 4 (1), 16.
- 13 52. Deatherage, D. E.; Barrick, J. E., Identification of mutations in laboratory-evolved microbes  
14 from next-generation sequencing data using breseq. *Engineering and Analyzing Multicellular*  
15 *Systems: Methods and Protocols* **2014**, 1151, 165-188.
- 16 53. Yang, G.; Zhang, Y.; Lee, N. K.; Cozad, M. A.; Kearney, S. E.; Luesch, H.; Ding, Y.,  
17 Cyanobacterial Sfp-type phosphopantetheinyl transferases functionalize carrier proteins of  
18 diverse biosynthetic pathways. *Sci Rep* **2017**, 7 (1), 11888.
- 19 54. Vidal, M.; Brachmann, R. K.; Fattaey, A.; Harlow, E.; Boeke, J. D., Reverse two-hybrid and  
20 one-hybrid systems to detect dissociation of protein-protein and DNA-protein interactions.  
21 *Proc Natl Acad Sci U S A* **1996**, 93 (19), 10315-10320.
- 22 55. Ungerer, J.; Pakrasi, H. B., Cpf1 is a versatile tool for CRISPR genome editing across  
23 diverse species of cyanobacteria. *Sci Rep* **2016**, 6 (1), 39681.
- 24 56. Bishe, B.; Taton, A.; Golden, J. W., Modification of RSF1010-based broad-host-range  
25 plasmids for improved conjugation and cyanobacterial bioprospecting. *iScience* **2019**, 20,  
26 216-228.
- 27 57. Puerta-Fernandez, E.; Vioque, A., Hfq is required for optimal nitrate assimilation in the  
28 cyanobacterium *Anabaena* sp. strain PCC 7120. *J Bacteriol* **2011**, 193 (14), 3546-3555.
- 29 58. Cai, Y. P.; Wolk, C. P., Use of a conditionally lethal gene in *Anabaena* sp. strain PCC 7120  
30 to select for double recombinants and to entrap insertion sequences. *J Bacteriol* **1990**, 172  
31 (6), 3138-3145.
- 32 59. Niu, T. C.; Lin, G. M.; Xie, L. R.; Wang, Z. Q.; Xing, W. Y.; Zhang, J. Y.; Zhang, C. C.,  
33 Expanding the potential of CRISPR-Cpf1-based genome editing technology in the  
34 cyanobacterium *Anabaena* PCC 7120. *ACS Synth Biol* **2019**, 8 (1), 170-180.
- 35 60. Engler, C.; Kandzia, R.; Marillonnet, S., A one pot, one step, precision cloning method with  
36 high throughput capability. *PLoS One* **2008**, 3 (11), e3647.
- 37 61. Edwards, D. J.; Marquez, B. L.; Nogle, L. M.; McPhail, K.; Goeger, D. E.; Roberts, M. A.;  
38 Gerwick, W. H., Structure and biosynthesis of the jamaicamides, new mixed polyketide-  
39 peptide neurotoxins from the marine cyanobacterium *Lyngbya majuscula*. *Chem Biol* **2004**,  
40 11 (6), 817-33.
- 41 62. Flores, E.; Arevalo, S.; Burnat, M., Cyanophycin and arginine metabolism in cyanobacteria.  
42 *Algal Res* **2019**, 42, Article 101577.
- 43 63. Hutchins, D. A.; Fu, F.-X.; Zhang, Y.; Warner, M. E.; Feng, Y.; Portune, K.; Bernhardt, P. W.;  
44 Mulholland, M. R., CO<sub>2</sub> control of *Trichodesmium* N<sub>2</sub> fixation, photosynthesis, growth rates,  
45 and elemental ratios: Implications for past, present, and future ocean biogeochemistry.  
46 *Limnology and Oceanography* **2007**, 52 (4), 1293-1304.
- 47 64. Yoon, J. H.; Sim, S. J.; Kim, M.-S.; Park, T. H., High cell density culture of *Anabaena*  
48 *variabilis* using repeated injections of carbon dioxide for the production of hydrogen.  
49 *International Journal of Hydrogen Energy* **2002**, 27 (11), 1265-1270.



- 1 65. Ji, X.; Verspagen, J. M. H.; Van de Waal, D. B.; Rost, B.; Huisman, J., Phenotypic plasticity  
2 of carbon fixation stimulates cyanobacterial blooms at elevated CO<sub>2</sub>. *Sci Adv* **2020**, *6* (8),  
3 eaax2926.
- 4 66. Berlinck, R. G. S.; Bertonha, A. F.; Takaki, M.; Rodriguez, J. P. G., The chemistry and  
5 biology of guanidine natural products. *Nat Prod Rep* **2017**, *34* (11), 1264-1301.
- 6 67. Gerwick, W. H.; Moore, B. S., Lessons from the past and charting the future of marine  
7 natural products drug discovery and chemical biology. *Chem Biol* **2012**, *19* (1), 85-98.
- 8 68. Rutledge, P. J.; Challis, G. L., Discovery of microbial natural products by activation of silent  
9 biosynthetic gene clusters. *Nat Rev Microbiol* **2015**, *13* (8), 509-523.
- 10 69. Fenical, W.; Jensen, P. R., Developing a new resource for drug discovery: marine  
11 actinomycete bacteria. *Nature chemical biology* **2006**, *2* (12), 666-673.
- 12 70. Amiri Moghaddam, J.; Crusemann, M.; Alanjary, M.; Harms, H.; Davila-Cespedes, A.; Blom,  
13 J.; Poehlein, A.; Ziemert, N.; Konig, G. M.; Schaberle, T. F., Analysis of the genome and  
14 metabolome of marine myxobacteria reveals high potential for biosynthesis of novel  
15 specialized metabolites. *Sci Rep* **2018**, *8* (1), 16600.
- 16 71. Chang, Z.; Sitachitta, N.; Rossi, J. V.; Roberts, M. A.; Flatt, P. M.; Jia, J.; Sherman, D. H.;  
17 Gerwick, W. H., Biosynthetic pathway and gene cluster analysis of curacin A, an antitubulin  
18 natural product from the tropical marine cyanobacterium *Lyngbya majuscula*. *J Nat Prod*  
19 **2004**, *67* (8), 1356-1367.
- 20 72. Paatero, A. O.; Kellosalo, J.; Duniak, B. M.; Almaliti, J.; Gestwicki, J. E.; Gerwick, W. H.;  
21 Taunton, J.; Paavilainen, V. O., Apratoxin kills cells by direct blockade of the Sec61 protein  
22 translocation channel. *Cell Chem Biol* **2016**, *23* (5), 561-566.
- 23 73. Luesch, H.; Moore, R. E.; Paul, V. J.; Mooberry, S. L.; Corbett, T. H., Isolation of dolastatin  
24 10 from the marine cyanobacterium *Symploca* species VP642 and total stereochemistry and  
25 biological evaluation of its analogue symprostatin 1. *J Nat Prod* **2001**, *64* (7), 907-910.
- 26 74. Newman, D. J.; Cragg, G. M., Current status of marine-derived compounds as warheads in  
27 anti-tumor drug candidates. *Mar Drugs* **2017**, *15* (4), 99.
- 28 75. Kouprina, N.; Larionov, V., Selective isolation of genomic loci from complex genomes by  
29 transformation-associated recombination cloning in the yeast *Saccharomyces cerevisiae*.  
30 *Nat Protoc* **2008**, *3* (3), 371-377.
- 31 76. Tang, X.; Li, J.; Millan-Aguinaga, N.; Zhang, J. J.; O'Neill, E. C.; Ugalde, J. A.; Jensen, P. R.;  
32 Mantovani, S. M.; Moore, B. S., Identification of thiotetronic acid antibiotic biosynthetic  
33 pathways by target-directed genome mining. *ACS Chem Biol* **2015**, *10* (12), 2841-2849.
- 34 77. Niederholtmeyer, H.; Wolfstader, B. T.; Savage, D. F.; Silver, P. A.; Way, J. C., Engineering  
35 cyanobacteria to synthesize and export hydrophilic products. *Appl Environ Microbiol* **2010**,  
36 *76* (11), 3462-3466.
- 37 78. Elhai, J.; Vepritskiy, A.; Muro-Pastor, A. M.; Flores, E.; Wolk, C. P., Reduction of conjugal  
38 transfer efficiency by three restriction activities of *Anabaena* sp. strain PCC 7120. *J Bacteriol*  
39 **1997**, *179* (6), 1998-2005.
- 40 79. Taton, A.; Lis, E.; Adin, D. M.; Dong, G.; Cookson, S.; Kay, S. A.; Golden, S. S.; Golden, J.  
41 W., Gene transfer in *Leptolyngbya* sp. strain BL0902, a cyanobacterium suitable for  
42 production of biomass and bioproducts. *PLoS One* **2012**, *7* (1), e30901.
- 43 80. Rippka, R.; Deruelles, J.; Waterbury, J. B.; Herdman, M.; Stanier, R. Y., Generic  
44 assignments, strain histories and properties of pure cultures of cyanobacteria. *J Gen*  
45 *Microbiol* **1979**, *111* (Mar), 1-61.
- 46 81. Gibb, S.; Strimmer, K., MALDIquant: a versatile R package for the analysis of mass  
47 spectrometry data. *Bioinformatics* **2012**, *28* (17), 2270-2271.
- 48 82. Wang, M.; Carver, J. J.; Phelan, V. V.; Sanchez, L. M.; Garg, N.; Peng, Y.; Nguyen, D. D.;  
49 Watrous, J.; Kaponov, C. A.; Luzzatto-Knaan, T.; Porto, C.; Bouslimani, A.; Melnik, A. V.;  
50 Meehan, M. J.; Liu, W. T.; Crusemann, M.; Boudreau, P. D.; Esquenazi, E.; Sandoval-  
51 Calderon, M.; Kersten, R. D.; Pace, L. A.; Quinn, R. A.; Duncan, K. R.; Hsu, C. C.; Floros, D.

1 J.; Gavilan, R. G.; Kleigrewe, K.; Northen, T.; Dutton, R. J.; Parrot, D.; Carlson, E. E.; Aigle,  
2 B.; Michelsen, C. F.; Jelsbak, L.; Sohlenkamp, C.; Pevzner, P.; Edlund, A.; McLean, J.; Piel,  
3 J.; Murphy, B. T.; Gerwick, L.; Liaw, C. C.; Yang, Y. L.; Humpf, H. U.; Maansson, M.;  
4 Keyzers, R. A.; Sims, A. C.; Johnson, A. R.; Sidebottom, A. M.; Sedio, B. E.; Klitgaard, A.;  
5 Larson, C. B.; P, C. A. B.; Torres-Mendoza, D.; Gonzalez, D. J.; Silva, D. B.; Marques, L. M.;  
6 Demarque, D. P.; Pociute, E.; O'Neill, E. C.; Briand, E.; Helfrich, E. J. N.; Granatosky, E. A.;  
7 Glukhov, E.; Ryffel, F.; Houson, H.; Mohimani, H.; Kharbush, J. J.; Zeng, Y.; Vorholt, J. A.;  
8 Kurita, K. L.; Charusanti, P.; McPhail, K. L.; Nielsen, K. F.; Vuong, L.; Elfeki, M.; Traxler, M.  
9 F.; Engene, N.; Koyama, N.; Vining, O. B.; Baric, R.; Silva, R. R.; Mascuch, S. J.; Tomasi,  
10 S.; Jenkins, S.; Macherla, V.; Hoffman, T.; Agarwal, V.; Williams, P. G.; Dai, J.; Neupane,  
11 R.; Gurr, J.; Rodriguez, A. M. C.; Lamsa, A.; Zhang, C.; Dorrestein, K.; Duggan, B. M.;  
12 Almaliti, J.; Allard, P. M.; Phapale, P.; Nothias, L. F.; Alexandrov, T.; Litaudon, M.;  
13 Wolfender, J. L.; Kyle, J. E.; Metz, T. O.; Peryea, T.; Nguyen, D. T.; VanLeer, D.; Shinn, P.;  
14 Jadhav, A.; Muller, R.; Waters, K. M.; Shi, W.; Liu, X.; Zhang, L.; Knight, R.; Jensen, P. R.;  
15 Palsson, B. O.; Pogliano, K.; Linington, R. G.; Gutierrez, M.; Lopes, N. P.; Gerwick, W. H.;  
16 Moore, B. S.; Dorrestein, P. C.; Bandeira, N., Sharing and community curation of mass  
17 spectrometry data with Global Natural Products Social Molecular Networking. *Nat Biotechnol*  
18 **2016**, 34 (8), 828-837.  
19
